# Supplementary material
Source: PubMed Central journal article supplement (PMC8487921)

# Supplementary figure 1

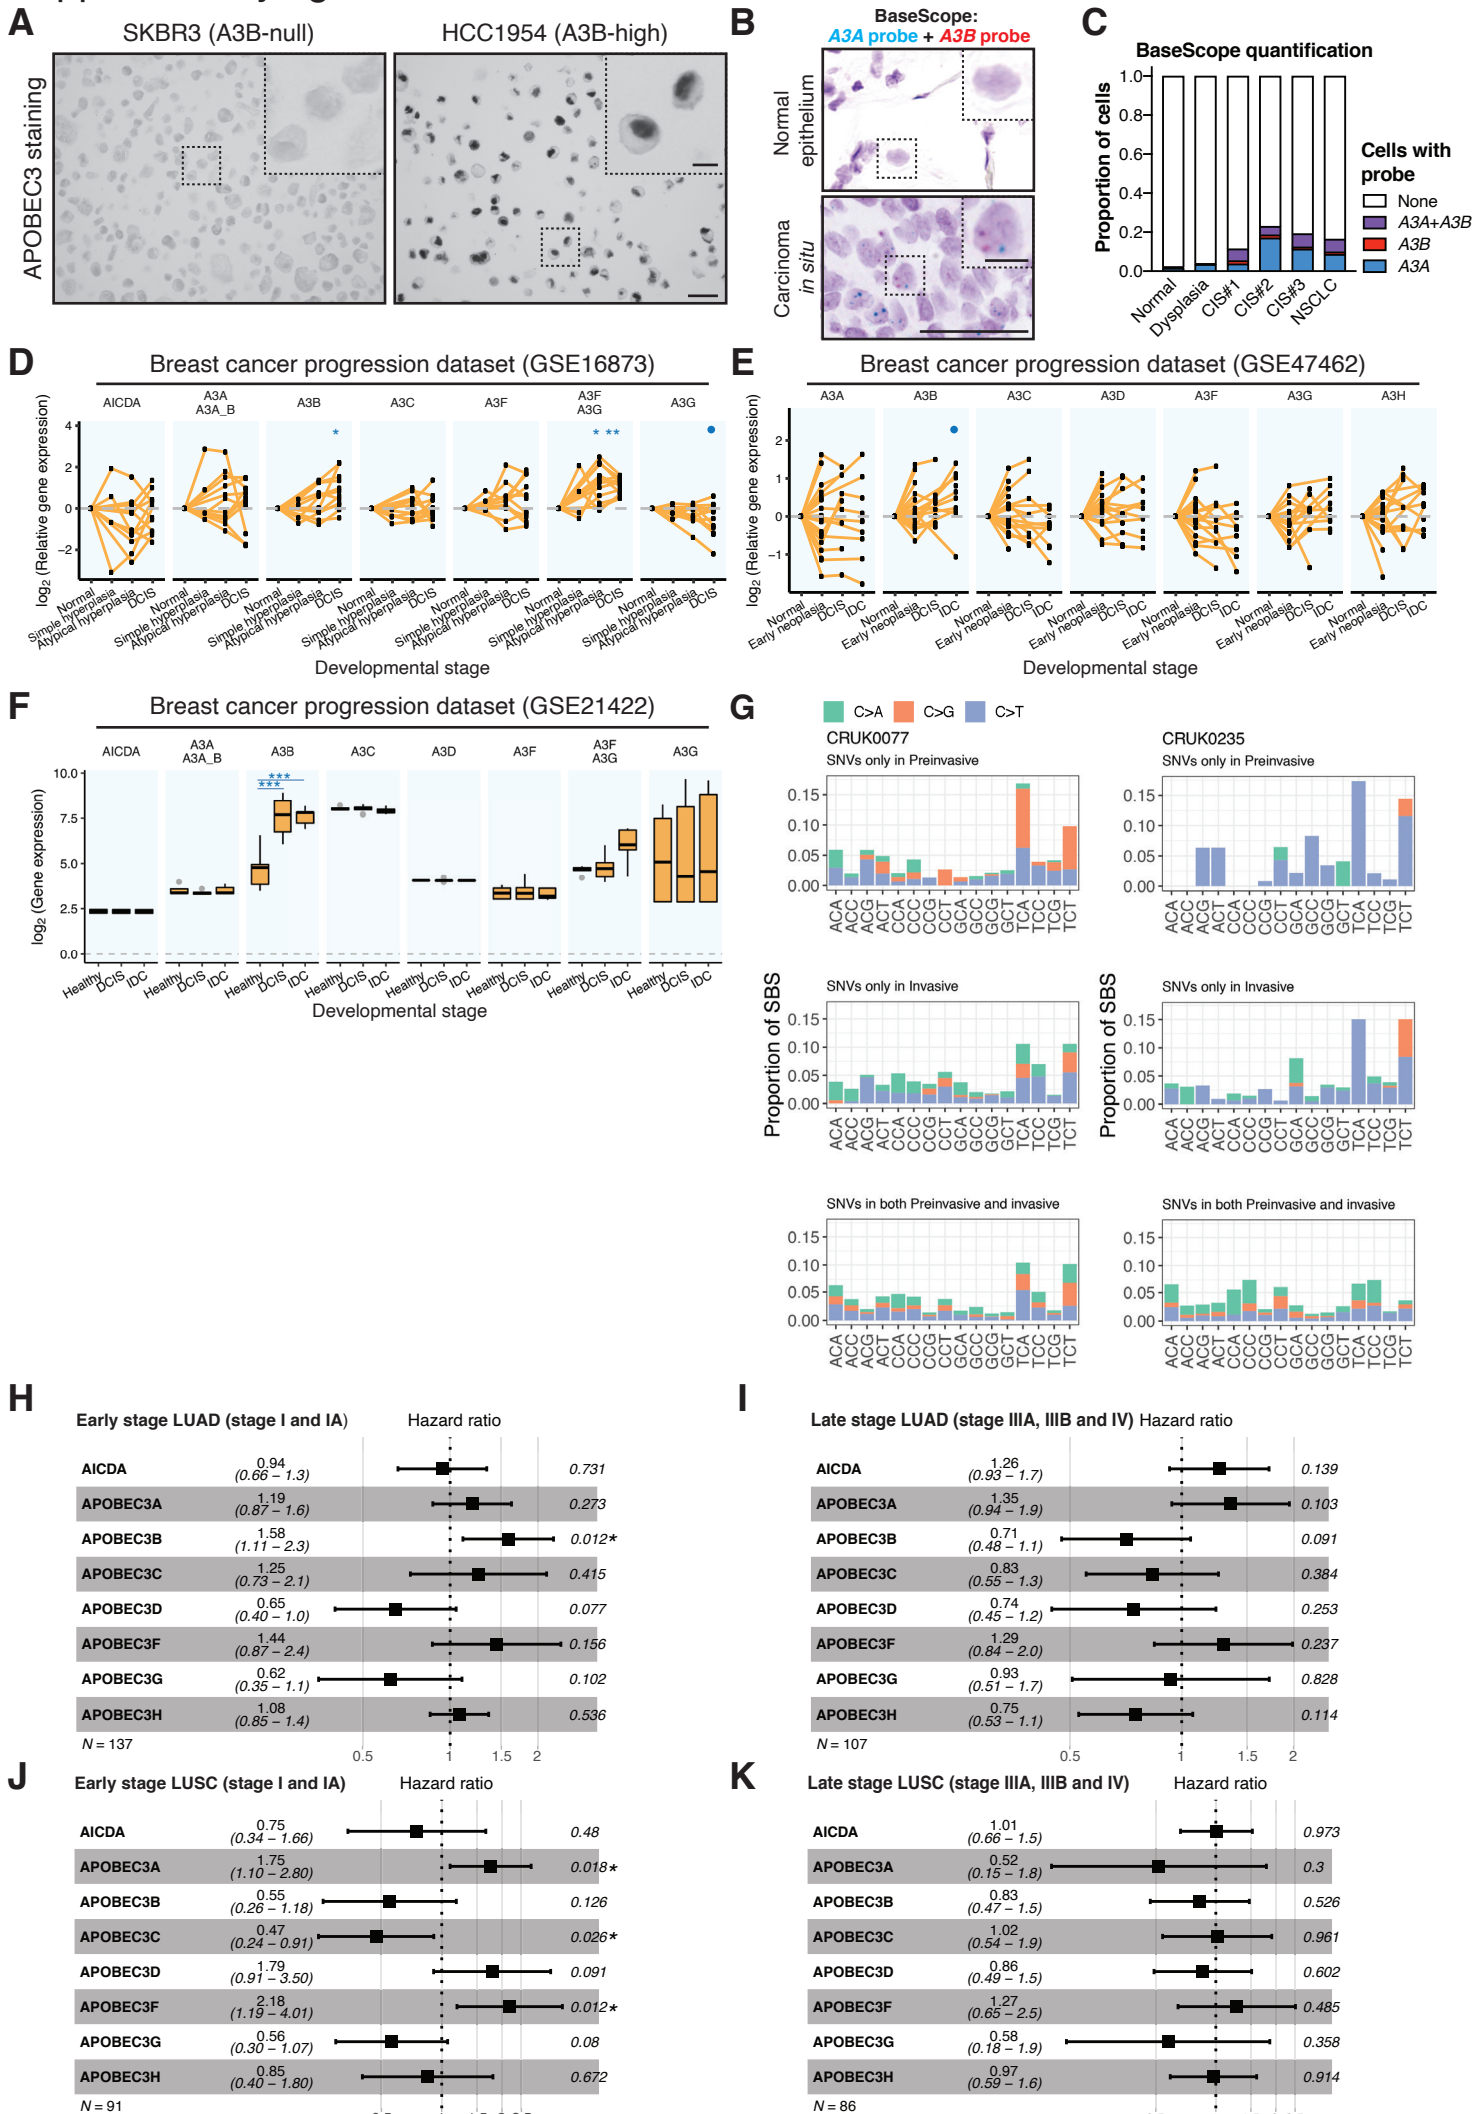

# Supplementary figure 2

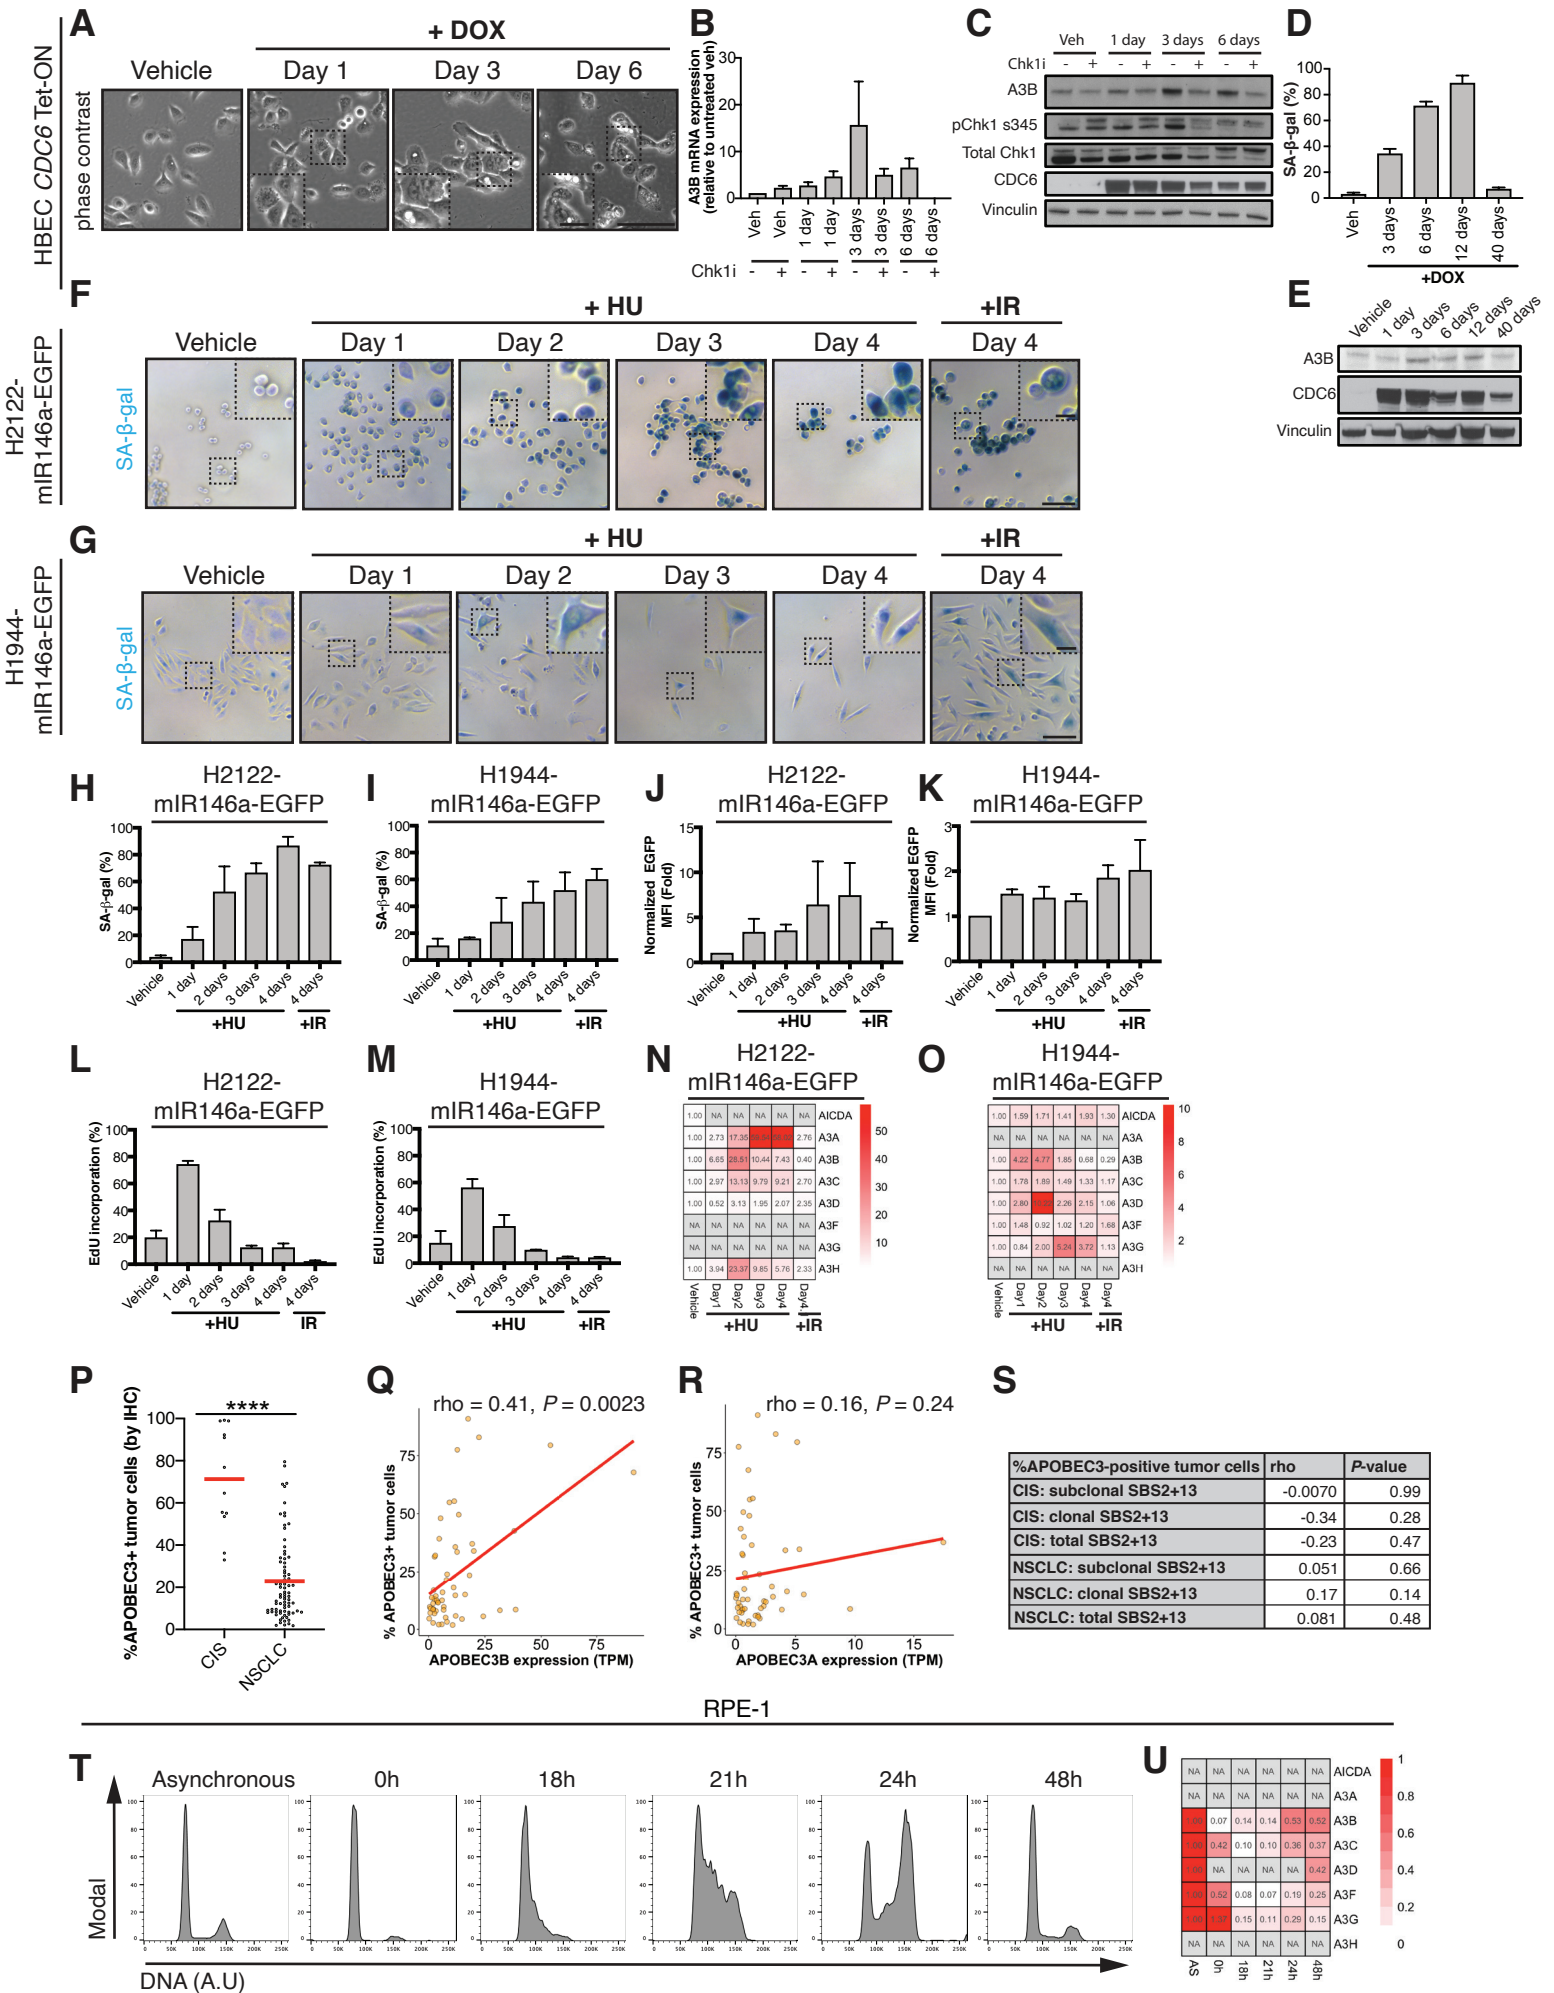

# Supplementary figure 3

**A**

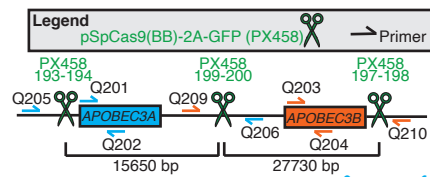

**B**

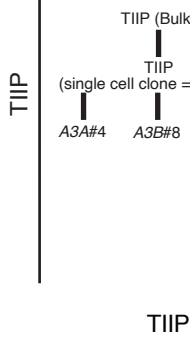

**C**

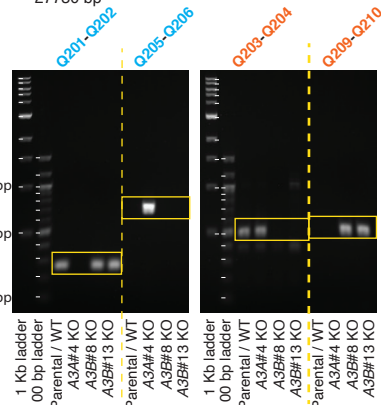

**D**

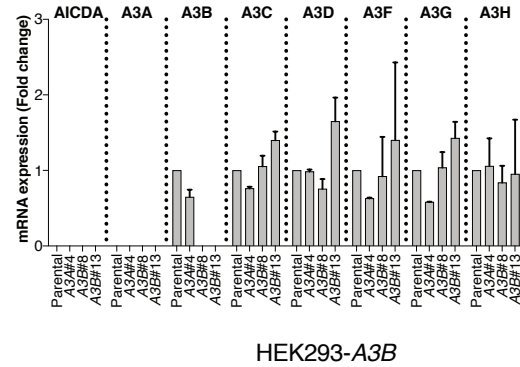

**E**

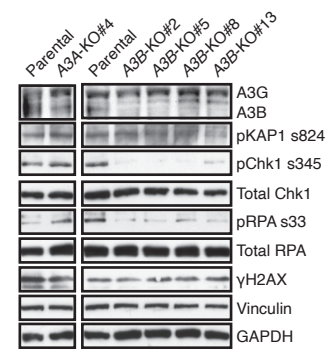

**F**

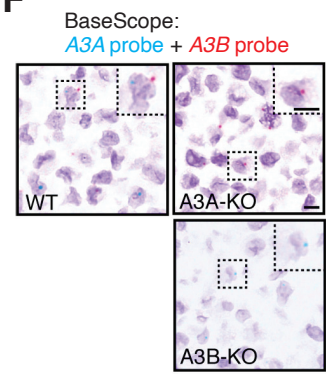

**G**

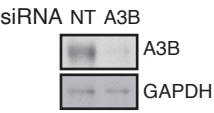

**H**

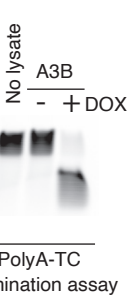

**I**

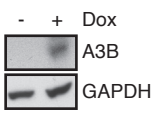

**J**

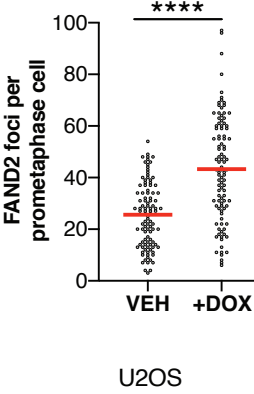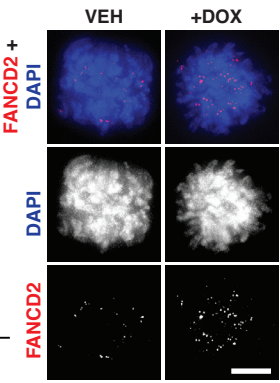

**K**

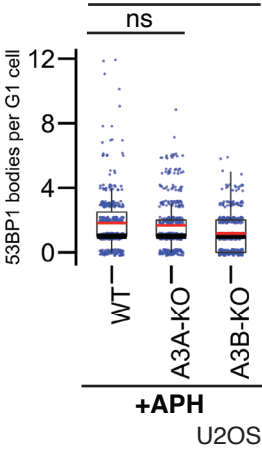

**L**

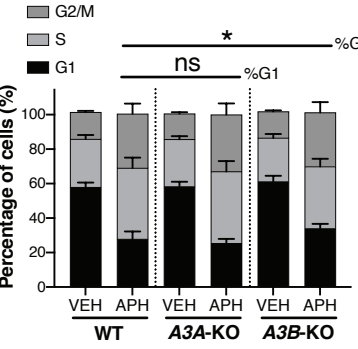

**M**

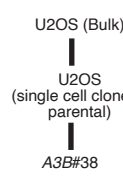

**N**

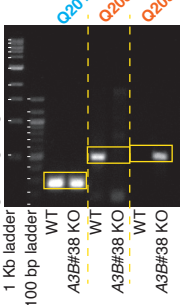

**O**

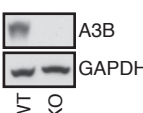

**P**

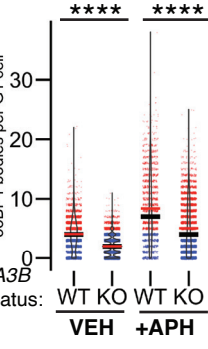

**Q**

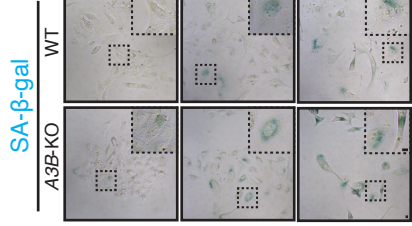

**R**

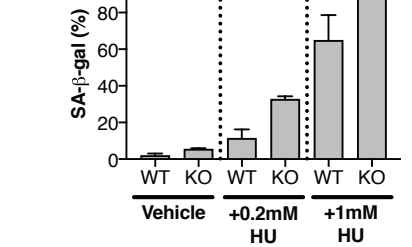

**S**

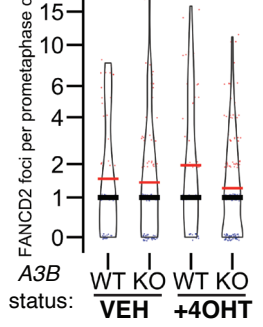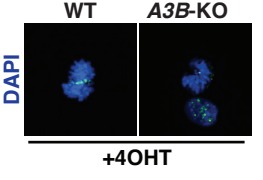

**T**

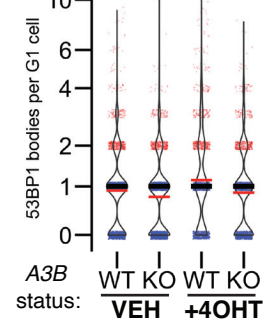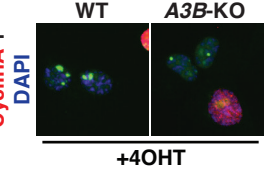

# Supplementary figure 4

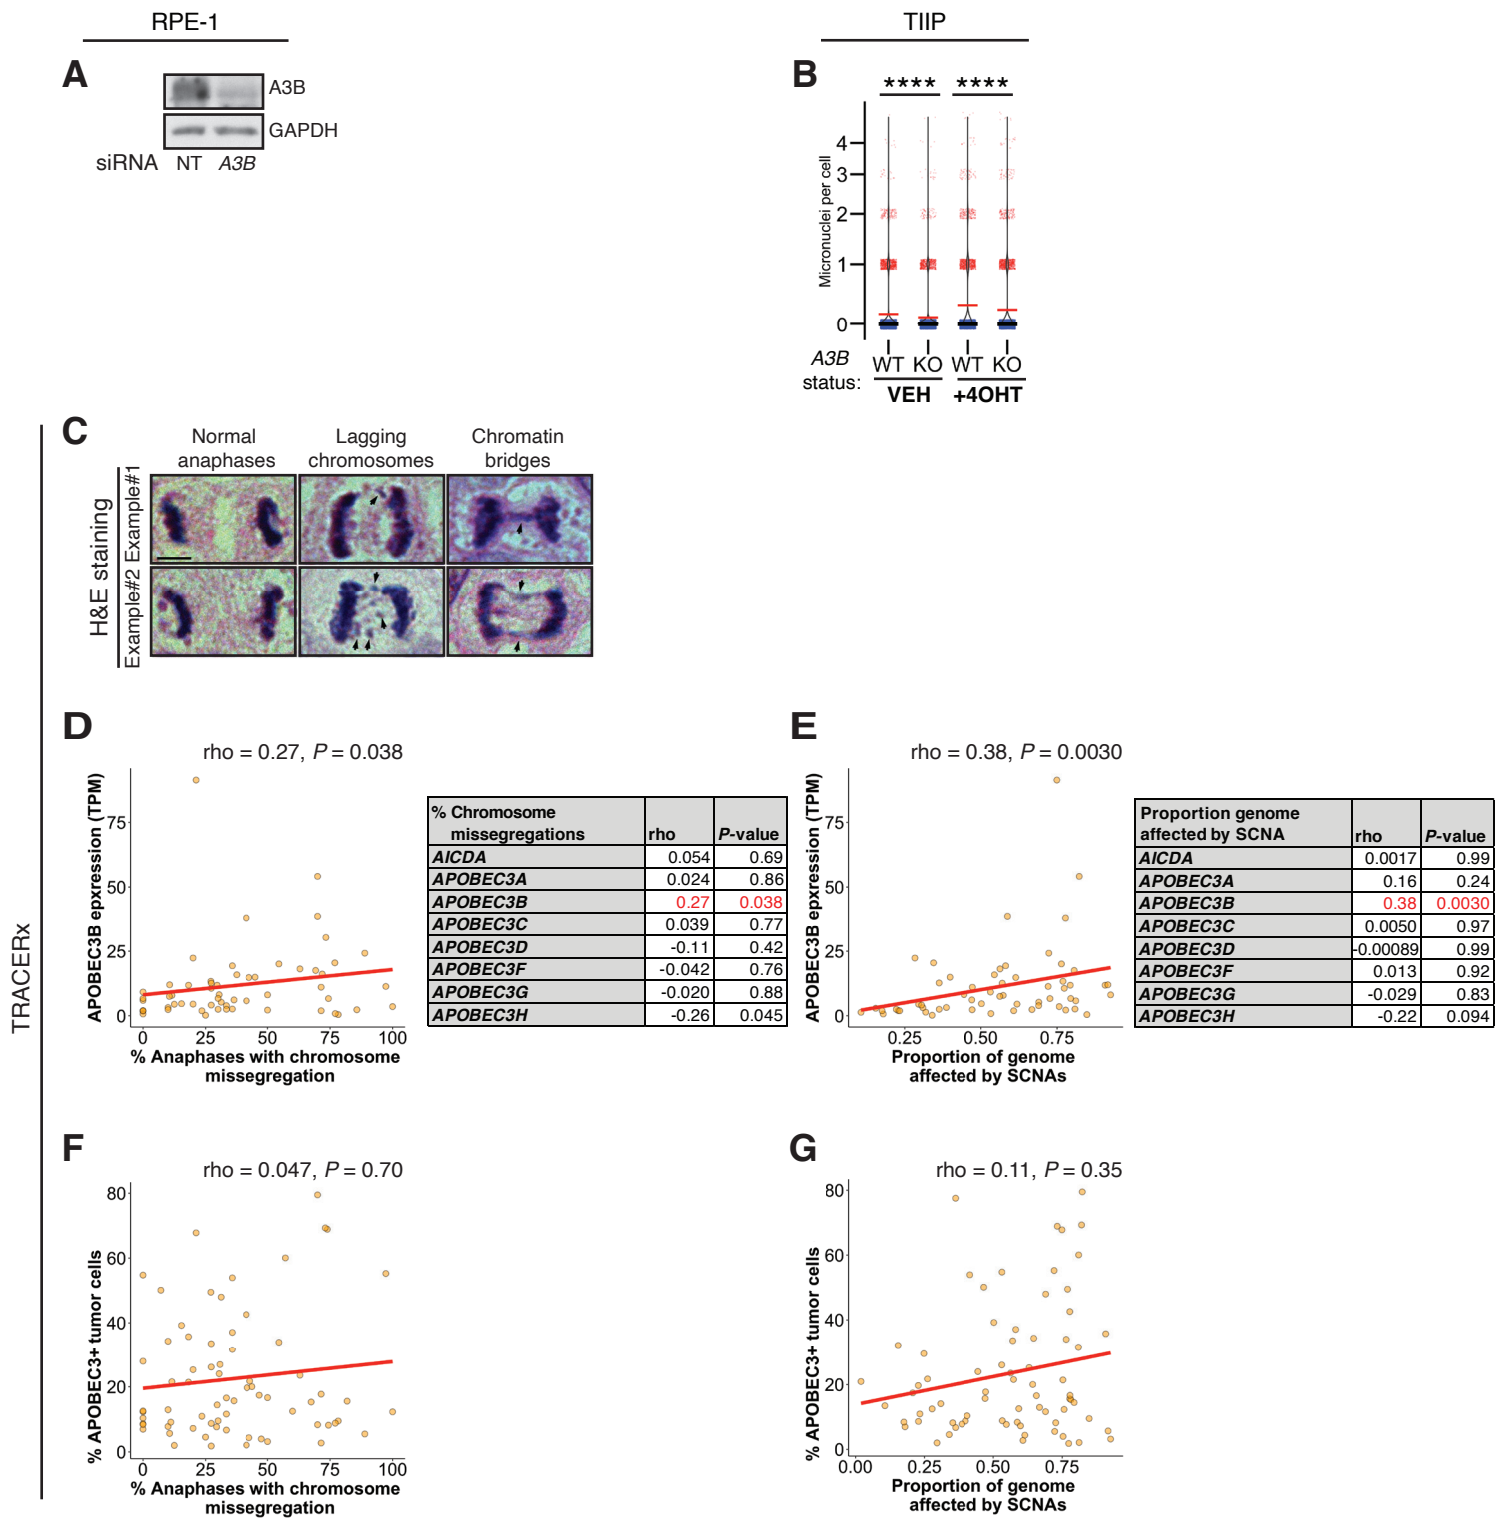

Supplement: NIHMS1710791-supplement-1.pdf [file NIHMS1710791-supplement-1.pdf]
