# Supplementary material
Source: PubMed Central journal article supplement (PMC8487921)
Supplement: NIHMS1710791-supplement-Supplementary_Tables_1-4.pdf [file NIHMS1710791-supplement-Supplementary_Tables_1-4.pdf]

## SUPPLEMENTARY TABLES

**Supplementary Table 1. Data resource**

| <b>Data resource</b>              | <b>Authors (year)</b>        | <b>Identifier</b>                      |
|-----------------------------------|------------------------------|----------------------------------------|
| TRACERx 100                       | Jamal-Hanjani et al., (2017) | PMID: 28445112                         |
| TRACERx 100                       | Biswas et al., (2019)        | PMID: 31591602                         |
| LUAD progression dataset          | Morton et al., (2014)        | PMID: 24735754<br>GEO ID: GSE52248     |
| LUAD progression dataset          | Chen et al., (2019)          | PMID: 31784532                         |
| LUSC progression dataset          | Mascaux et al., (2019)       | PMID: 31243362<br>GEO ID: GSE33479     |
| TCGA NSCLC dataset                | Campbell et al., (2016)      | dbGaP accession no:<br>phs000178.v9.p8 |
| Breast cancer progression dataset | Emery et al., (2009)         | PMID: 19700746<br>GEO ID: GSE16873     |
| Breast cancer progression dataset | Brunner et al., (2014)       | PMID: 24887547<br>GEO ID: GSE47462     |
| Breast cancer progression dataset | Kretschmer et al., (2011)    | PMID: 21314937<br>GEO ID: GSE21422     |

**Supplementary Table 2. List of antibodies used for immunofluorescence**

| <b>Protein</b> | <b>Company</b>                     | <b>Cat#</b> | <b>Dilution</b> |
|----------------|------------------------------------|-------------|-----------------|
| APOBEC3        | Custom mAb from R.S.<br>Harris lab | 5210-87-13  | 1:1000          |
| Ki67           | Thermo Fisher Scientific           | 14-5698-82  | 1:5000          |
| p21            | BD Biosciences                     | 556430      | 1:250           |
| 53BP1          | Novus Biologicals                  | NB100-305   | 1:1000          |
| Cyclin A       | Santa Cruz                         | sc-56299    | 1:1000          |
| FANCD2         | Novus Biologicals                  | NB100-182   | 1:1000          |
| Total RPA2     | Abcam                              | ab2175      | 1:1000          |

**Supplementary Table 3. List of antibodies used for western blotting**

| Protein       | Company                            | Cat#       | Dilution |
|---------------|------------------------------------|------------|----------|
| APOBEC3       | Custom mAb from<br>R.S. Harris lab | 5210-87-13 | 1:1000   |
| pKAP-1 (S824) | Bethyl                             | A300-767A  | 1:2000   |
| pRPA32 (S33)  | Bethyl                             | A300-246A  | 1:1000   |
| pRPA2 (S4/S8) | Novus Biologicals                  | NBP123017  | 1:2000   |
| Total RPA32   | CST                                | 2208s      | 1:1000   |
| $\gamma$ H2AX | Sigma-Aldrich                      | 05-636     | 1:2000   |
| GAPDH         | Abcam                              | ab9482     | 1:1000   |
| Vinculin      | Abcam                              | ab73412    | 1:2000   |

**Supplementary Table 4. List of primers used for PCR**

| Gene            | Forward primer        | Reverse primer          |
|-----------------|-----------------------|-------------------------|
| <i>AICDA</i>    | TCGGCGTGAGACCTACCTGT  | GCCAGGGTCTAGGTCCCAGT    |
| <i>APOBEC3A</i> | GAGAAGGGACAAGCACATGG  | TGGATCCATCAAGTGTCTGG    |
| <i>APOBEC3B</i> | GACCCTTTGGTCCTTCGAC   | GCACAGCCCCAGGAGAAG      |
| <i>APOBEC3C</i> | AGCGCTTCAGAAAAGAGTGG  | AAGTTTCGTTCCGATCGTTG    |
| <i>APOBEC3D</i> | ACCCAAACGTCAAGTCGAATC | CACATTTCTGCGTGGTTCTC    |
| <i>APOBEC3F</i> | CCGTTTGGACGCAAAGAT    | CCAGGTGATCTGGAACACTT    |
| <i>APOBEC3G</i> | CCGAGGACCCGAAGGTTAC   | TCCAACAGTGCTGAAATTCG    |
| <i>APOBEC3H</i> | AGCTGTGGCCAGAAGCAC    | CGGAATGTTTCGGCTGTT      |
| <i>GAPDH</i>    | TCACCACCATGGAGAAGGCT  | CAGGAGGCATTGCTGATGATC   |
| CDC6            | AAACCCGATCCCAGGCACAG  | AGGCAGGGCTTTTACACGAGGAG |
| Q201            | CCTCCTCTGGTCTTTTCCCT  |                         |
| Q202            |                       | GAAACCACAAGTACAATCCGG   |
| Q203            | TTGGTGCTGCCCCCTC      |                         |
| Q204            |                       | TAGAGACTGAGGCCCAT       |
| Q205            | GAAAAGGGACCCATGCACAG  |                         |
| Q206            |                       | CAAACAAGCAACGACCATG     |
| Q209            | TGTCCTCTCCCCTTAACCCT  |                         |
| Q210            |                       | TAGAGTCAGGGATGGGGTCA    |
